1 **Phosphorus is a critical factor of the *in vitro* monoxenic culture method for a**  
2 **wide range of arbuscular mycorrhizal fungi culture collections**

3

4 Takumi Sato<sup>1</sup>, Kenta Suzuki<sup>1</sup>, Erika Usui<sup>1</sup>, Yasunori Ichihashi<sup>1,\*</sup>

5

6 <sup>1</sup> Riken BioResource Research Center, Tsukuba, Ibaraki 305-0074, Japan.

7

8 \* Correspondence:

9 Yasunori Ichihashi, [yasuhnori.ichihashi@riken.jp](mailto:yasuhnori.ichihashi@riken.jp)

10

11 **Abstract**

12 Establishing an effective way to propagate a wide range of arbuscular mycorrhizal  
13 (AM) fungi species is desirable for mycorrhizal research and agricultural  
14 applications. Although the success of mycorrhizal formation is required for spore  
15 production of AM fungi, the critical factors for its construction in the *in vitro*  
16 monoxenic culture protocol remain to be identified. In this study, we evaluated the  
17 growth of hairy roots from carrot, flax, and chicory, and investigated the effects of  
18 the phosphorus (P) concentration in the mother plate, as well as the levels of P,  
19 sucrose, and macronutrients in a cocultivation plate with a hairy root, amount of  
20 medium of the cocultivation plate, and location of spore inoculation, by utilizing the  
21 Bayesian information criterion model selection with greater than 800 units of data.  
22 We found that the flax hairy root was suitable for *in vitro* monoxenic culture, and  
23 that the concentration of P in the cocultivation plate was a critical factor for  
24 mycorrhizal formation. We showed that an extremely low concentration of P (3  $\mu$ M)  
25 significantly improved mycorrhizal formation for AM fungi belonging to the  
26 Glomerales order, while a high concentration of P (30  $\mu$ M) was suitable for  
27 Diversisporales fungi. Therefore, we anticipate that the refining the P concentration  
28 will contribute to future culture collections of a wide range of AM fungi.

29

## 30 **Introduction**

31 Arbuscular mycorrhizal (AM) fungi are obligate biotrophs that develop symbiotic  
32 relationships with the vast majority of land plants, to create arguably the world's  
33 most prevalent mutualism (Brundrett, 2009; Smith and Read, 2008). Through  
34 symbiosis, AM fungi allow plants to obtain soil resources effectively, while receiving  
35 carbon in the form of sugars and lipids from the host plants (Luginbuehl et al., 2017).  
36 These fungi also confer tolerance against environmental stresses such as water,  
37 salinity, and heavy metal levels to the hosts (Augé et al., 2014; Díaz et al., 1996;  
38 Porcel et al., 2012), and enhance disease resistance and photosynthetic activity  
39 (Boldt et al., 2011; Jung et al., 2012; Pozo & Azcón-Aguilar, 2007). Because of these  
40 beneficial effects to plants, substantial efforts have been made to establish ways to  
41 propagate AM fungi for agricultural applications (Berruti et al., 2016; Sawers et al.,  
42 2008).

43 AM fungi belong to the subphylum Glomeromycotina and originated in the  
44 Ordovician period, approximately 480 million years ago (Redecker et al., 2000;  
45 Spatafora et al., 2016). Approximately 342 AM fungal species have been reported  
46 and classified into four orders (Diversisporales, Glomerales, Archaeosporales, and  
47 Paraglomerales), 11 families, and 43 genera (Redecker et al. 2013, [http://www.amf-  
48 phylogeny.com/amphylo\\_species.html](http://www.amf-phylogeny.com/amphylo_species.html)). Since the majority are unculturable under  
49 *in vitro* conditions, their symbiotic functions in host plants are largely unknown.  
50 Since AM fungi and their host plants interact in complex underground networks  
51 involving multiple partners, an *in vitro* pure culture method for an isolated AM  
52 fungus is required to directly assess the symbiotic interaction between AM fungi and  
53 their hosts.

54 One of the most successful methods of *in vitro* pure culture for AM fungi is  
55 the use of Ri T-DNA transformed roots (hairy roots), known as *in vitro* monoxenic  
56 culturing (Bécard & Fortin, 1988a; Chabot et al., 1992; Cranenbrouck et al., 2005;  
57 Mugnier & Mosse, 1987). In the past three decades, *in vitro* monoxenic culturing  
58 with hairy roots has become an important technique for investigating the physiology  
59 of AM fungi and their associations with host plants (Fortin et al., 2002). Using this  
60 method, spores of the AM fungus *Rhizophagus irregularis* can be propagated *in vitro*  
61 for laboratory and greenhouse use and as a commercial inoculum for increasing crop  
62 yields (Berruti et al., 2016), such as that of potato (Hijri, 2016), wheat (Al-Karaki et

63 al., 2004), and cassava (Ceballos et al., 2013). Although there have been intensive  
64 efforts to improve spore production of AM fungi in the protocols for *in vitro*  
65 monoxenic culture (Douds, 2002; Rosikiewicz et al., 2017), the success rate of  
66 mycorrhizal formation, which is a prerequisite for spore production, remains to be  
67 determined. In particular, there are no known reports assessing the critical factors  
68 for mycorrhizal formation in the *in vitro* monoxenic culture protocol for several AM  
69 fungal species.

70 In this study, we investigated six factors (the concentration of P in the  
71 mother plate; the concentration of P, sucrose, and macronutrient medium in a  
72 cocultivation plate with hairy root; the amount of medium in the cocultivation plate;  
73 and the location of spore inoculation) modified by the standard method provided by  
74 the Glomeromycota *in vitro* collection (GINCO, [http://www.mycorrhiza.be/ginco-](http://www.mycorrhiza.be/ginco-bel/)  
75 [bel/](http://www.mycorrhiza.be/ginco-bel/)) to identify critical factor(s) for mycorrhizal formation in the *in vitro* monoxenic  
76 culture. We found that the concentration of P in the cocultivation plate is a critical  
77 factor for mycorrhizal formation by regression analysis and showed that extremely  
78 low concentrations using flax hairy roots significantly improved the mycorrhizal  
79 formation of *R. irregularis*. In addition, we demonstrated that the modification the  
80 success rate of mycorrhizal formation for other AM fungi belonging to Glomerales  
81 can be higher than that of the standard method. Thus, altering the P concentration  
82 of the *in vitro* monoxenic culture method can contribute to a wide range of AM fungi  
83 culture collections.

84

## 85 **Materials and methods**

86

### 87 **Biological materials**

88 *Agrobacterium rhizogenes*-transformed roots of carrot (*Daucus carota* strain carrot  
89 DC2) flax (*Linum* sp. L. strain flax NM) and chicory (*Cichorium intybus* L. strain  
90 ChicoryA4NH), known as hairy roots, were obtained from GINCO. All were cultured  
91 on a modified Strullu–Romand (MSR) medium used as a cocultivation plate for AM  
92 fungi (Cranenbrouck et al., 2005) in Petri dishes (Asnol sterilization Petri dish,  
93 GD90-15, 90 mm diameter). The plates for culturing hairy roots were incubated in  
94 an inverted position in the dark at 25 °C and maintained by sub-culturing every 4  
95 weeks.

96 Sterile spore suspensions of the AM fungus *Rhizophagus irregularis*  
97 DAOM197198 and the inoculum of National Agriculture and Food Research  
98 Organization (NARO) AM fungi *Claroideoglossum etunicatum* MAFF520053  
99 *Scutellospora cerradensis* MAFF520056, *Ambispora callosa* MAFF520057,  
100 *Acaulospora longula* MAFF520060, *Gigaspora rosea* MAFF520062, *Acaulospora*  
101 *morrowiae* MAFF520081, *Rhizophagus clarus* MAFF520086, *Paraglossum occultum*  
102 MAFF520091, and *Claroideoglossum claroideum* MAFF520092 were obtained from  
103 Premier Tech (Quebec, Canada), and NARO Genebank  
104 ([https://www.gene.affrc.go.jp/index\\_j.php](https://www.gene.affrc.go.jp/index_j.php)), respectively. The strains of NARO AM  
105 fungi were propagated with Welsh onion (*Allium fistulosum* L. 'Motokura'), sorghum  
106 (*Sorghum bicolor* (L.) Moench. 'Ryokuhiyou sorugo'), and white clover (*Trifolium*  
107 *incarnatum* L. 'Dixie') grown in pots with quartz sand (Mikawakeisa Nomal No.5,  
108 Mikawakeisa Corp., Aichi, Japan). Centrifuge tubes (50 mL, Labcon North America,  
109 Petaluma, CA, USA) with an 8-mm-diameter hole with cotton ( $\Phi$  8×25 mm, Safe  
110 Basic cotton roll, A.R. Medicom Inc. (Asia) Ltd., Hyogo, Japan) at the bottom were  
111 used as pots. Each spore was isolated from each inoculum of AM fungi by wet sieving  
112 (500, 100, and 45  $\mu$ m meshes) and decanting (Gerdemann, 1955). Twenty spores of  
113 each AM fungus were placed between 30 g and 35 g of quartz sand in the pot, and 3–  
114 4 seeds of each host were sown on the upper layer of the sand. Each pot was irrigated  
115 with 10 mL of reverse osmosis water, covered with plastic wrap until seeds were  
116 germinated and thinned to three plants per pot. Every other day for 12 weeks after  
117 sowing, each pot was irrigated with 10 mL of half-strength Hoagland's solution  
118 containing 50  $\mu$ M phosphorus (P). At 12 weeks after sowing, irrigation was stopped  
119 for the host plants to senesce. Air-dried soil containing each spore of AM fungi was  
120 stored at 4 °C before use.

121 The half-strength Hoagland's solution contained 126.4 mg KNO<sub>3</sub>; 295.2 mg  
122 Ca(NO<sub>3</sub>)<sub>2</sub> · 4H<sub>2</sub>O; 123.3 mg MgSO<sub>4</sub> · 7H<sub>2</sub>O; 34 mg KH<sub>2</sub>PO<sub>4</sub> (corresponding to 50  $\mu$ M  
123 P); 196 mg K<sub>2</sub>SO<sub>4</sub>; 8.2 mg Fe (III)-EDTA; 0.72 mg H<sub>3</sub>BO<sub>3</sub>; 0.45 mg MnSO<sub>4</sub> · 4H<sub>2</sub>O; 0.06  
124 mg ZnSO<sub>4</sub> · 7H<sub>2</sub>O; 0.02 mg CuSO<sub>4</sub> · 5H<sub>2</sub>O; and 0.0063 mg Na<sub>2</sub>MoO<sub>4</sub> · 2H<sub>2</sub>O in 1 L  
125 distilled water.

126 The MSR medium contained 739 mg MgSO<sub>4</sub> · 7H<sub>2</sub>O; 76 mg KNO<sub>3</sub>; 65 mg  
127 KCl; 4.1 mg KH<sub>2</sub>PO<sub>4</sub> (corresponding to 30  $\mu$ M P); 359 mg Ca(NO<sub>3</sub>)<sub>2</sub> · 4H<sub>2</sub>O; 0.9 mg

128 calcium pantothenate;  $1 \times 10^{-3}$  mg biotin; 1 mg nicotinic acid; 0.9 mg pyridoxine; 1  
129 mg thiamine; 0.4 mg cyanocobalamin; 1.6 mg Na Fe (III)-EDTA; 2.45 mg  $\text{MnSO}_4 \cdot$   
130  $4\text{H}_2\text{O}$ ; 0.29 mg  $\text{ZnSO}_4 \cdot 7\text{H}_2\text{O}$ ; 1.86 mg  $\text{H}_3\text{BO}_3$ ; 0.24 mg  $\text{CuSO}_4 \cdot 5\text{H}_2\text{O}$ ; 0.0024 mg  
131  $\text{Na}_2\text{MoO}_4 \cdot 2\text{H}_2\text{O}$ ; 0.035 mg  $(\text{NH}_4)_6\text{Mo}_7\text{O}_{24} \cdot 4\text{H}_2\text{O}$ ; and 10,000 mg sucrose, solidified  
132 with 4,000 mg Phytigel in 1 L distilled water.

133 All chemicals were provided by Wako Pure Chemical Corp (Osaka, Japan),  
134 except for Fe(III)-EDTA, Na Fe (III)-EDTA, and Phytigel, which were received from  
135 Sigma-Aldrich (USA, MA, Burlington).

136

### 137 **Experiment 1—the evaluation of hairy root growth**

138 Experiment 1 was designed to compare the growth of hairy roots of carrot, flax, and  
139 chicory. Root fragments of 1 cm length were cut from the tips of hairy roots after 3  
140 weeks of subculture, transferred onto the MSR medium, and incubated in the dark  
141 at 25 °C for 4 weeks. The flesh weights of the hairy roots were then measured (n =  
142 12).

143

### 144 **Experiment 2—the evaluation of the success rate of AM fungal colonization in** 145 **different culture conditions.**

146 Experiment 2 was designed to evaluate different culture conditions and their  
147 success rate for AM fungal colonization using flax hairy roots and *R. irregularis*  
148 DAOM197198. A list of all culture conditions evaluated in Experiment 2 is presented  
149 in Table 1. Using the same conditions as Experiment 1 for a control, 1 cm-long flax  
150 hairy root fragments were transplanted onto the MSR medium and inoculated with  
151 approximately 100 spores of *R. irregularis* DAOM197198 at a distance of 2.5 cm from  
152 the root fragment, and incubated in the dark at 25 °C. The standard culture  
153 conditions were modified in the following order: mother plate P concentration (3  
154 and 30  $\mu\text{M}$ ), macronutrients in the MSR medium (the original and half of the  
155 concentration of N, P, K, Mg, Ca, and S in the MSR medium), P concentration (0.3, 3,  
156 15, and 30  $\mu\text{M}$ ) in the MSR medium, sucrose concentration (10 and 20 g/L) in the  
157 MSR medium, amount of MSR medium (10, 20, and 40 mL/plate), and location of the  
158 spore inoculation (distances of 1, 1.5, 2, 2.5, and 3 cm away from the root tip). Five  
159 plates were prepared as replicates, and 2–15 replicates for each condition were  
160 tested (Table 1). The success rate of AM fungal colonization was determined by the

161 presence or absence of elongation of the extraradical hyphae (EH) and spore  
162 formation (SF) at 30 and 60 days after inoculation. In addition, the number of spores  
163 in 3 and 30  $\mu\text{M}$  P in the MSR medium and in the 20 and 40 mL samples of the MSR  
164 medium were counted at 11 months after inoculation.

165

166 **Experiment 3—the evaluation of the success rate of colonization for different**  
167 **species of AM fungi in the optimized culture condition.**

168 Experiment 3 was designed to evaluate whether the concentration of P in the MSR  
169 medium is a critical factor based on Experiment 2 using *R. irregularis*, for the success  
170 rate of colonization of different AM fungal species. Spores of the NARO AM fungal  
171 species were collected from the propagated inoculum by wet sieving and the  
172 decanting technique described above. The collected spores were surface-sterilized  
173 using a modified method described by Bécard and Fortin (1988). Briefly, spores  
174 were sonicated with sterile 0.05% Tween 20 solution three times, soaked in 2%  
175 (w/v) chloramine T solution for 10 min, and rinsed three times with sterile 0.05%  
176 (w/v) Tween 20 solution. The surface-sterilized spores were stored in a sterile  
177 solution containing 0.02% (w/v) streptomycin and 0.01% (w/v) gentamycin at 4 °C  
178 until use. Each spore was inoculated onto the MSR medium with 1-cm-long flax hairy  
179 root fragments, inoculated with 5 spores at a distance of 2.5 cm from the root  
180 fragment, and incubated in the dark at 25 °C. The germinated spores were  
181 transferred from MSR medium with a scalpel and tweezers to 3 or 30  $\mu\text{M}$  P MSR  
182 medium. As previously mentioned, the success rates of AM fungal colonization and  
183 the presence or absence of elongation of EH and SF for different AM fungal species  
184 were determined at 30, 60, and 90 days after inoculation.

185

186 **Statistical analysis**

187 All statistical analyses were performed using R version 3.4.0. The data on the success  
188 rate of AM fungal colonization for all treatments were pooled and used for logistic  
189 regression analysis with model selection using the ‘bestglm’ utility of the R package  
190 (McLeod et al., 2020) to identify the main factors that contribute to the success rate  
191 of AM fungal colonization, and the mathematical functions that describe the  
192 methods these factors use to explain the success rate. By default, ‘bestglm’ uses the  
193 Bayesian information criterion (BIC) for model selection. Since BIC is appropriate

194 for controlled experiments with a limited number of important explanatory  
195 variables (Aho et al., 2014), it was deemed acceptable for identifying relevant  
196 common factors among the different criteria for the success of AM fungal  
197 colonization. To examine the differences among experimental groups, data were  
198 analyzed with Welch's *t*-test, Tukey's honest significant difference test, and the  
199 Games-Howell test ( $P < 0.05$ ).

200

## 201 **Results**

### 202 **Flax hairy root is suitable for *in vitro* monoxenic culture of AM fungi**

203 Carrot hairy roots have been widely used for *in vitro* monoxenic cultures of AM fungi  
204 (Cranenbrouck et al., 2005; Fortin et al., 2002; Kokkoris & Hart, 2019a). Recently,  
205 GINCO has provided flax and chicory hairy roots in addition to carrot hairy roots,  
206 and we assessed the flesh weight for the three varieties. The results showed that the  
207 flax hairy roots had significantly higher growth rates than chicory and carrot hairy  
208 roots during the four weeks of incubation (9.44- and 1.88-times, respectively) (Fig  
209 1A). In addition, the flax hairy root revealed the lowest coefficient of variation in dry  
210 weight (Fig 1B). This result indicates that flax hairy roots are suitable for *in vitro*  
211 monoxenic cultures of AM fungi because of their vigorous growth and robustness  
212 against experimental conditions.

213

### 214 **Success rate of AM fungal colonization in different culture conditions**

215 To identify the critical factor(s) for mycorrhizal formation in the *in vitro* monoxenic  
216 culture using flax hairy roots, we investigated the effects of different culture  
217 conditions (the concentration of P in the mother plate, the concentration of P,  
218 sucrose, and macronutrients in the cocultivation MSR medium with hairy root, the  
219 amount of cocultivation MSR medium, and the location of spore inoculation) on the  
220 success rate of AM fungal colonization, through the presence or absence of  
221 elongation of extraradical hyphae (EH), and the formation of spores (SF). We then  
222 compared the results to the standard method provided by GINCO (Fig. 2), and  
223 significant differences (Welch's *t*-test for two parameters; Games-Howell test for  
224 more than three parameters,  $P < 0.05$ ) were detected for all parameters except for  
225 sucrose concentration at 30 and 60 DAI and location of spore inoculation at 60 DAI  
226 (Fig. 2). To estimate the significant parameters for predicting the success rate of AM

227 fungal colonization, we performed a regression analysis using all the data collected  
228 in this study. For each of the binary variables based on the four success criteria as  
229 response variables, we identified a combination of explanatory parameters that  
230 minimized the BIC and their relative contributions (Table 2). The only factor  
231 included in all models was the concentration of P, and it had the largest contribution  
232 in all cases. In addition, the best model was obtained when the concentration of P  
233 was squared after non-linear logarithmic transformation in all cases (Table 3). Given  
234 that the coefficient of  $\log(x)^2$  (x represents the concentration of P) was negative for  
235 all models, the colonization success rate peaked at a low P concentration (Fig. 3).  
236 The modification with 3  $\mu\text{M}$  P in the MSR medium significantly improved the success  
237 rate of AM fungal colonization by 2.05–3.25 times for EH and 1.50–8.00 times for SF  
238 compared with the standard method, suggesting that 3  $\mu\text{M}$  P in the MSR medium  
239 was an optimal concentration for the success rate of *R. irregularis* colonization (Fig.  
240 2).

241 To validate the improvement of AM fungal colonization prior to  
242 sporulation, we observed that the conditions of 3  $\mu\text{M}$  P in the MSR medium produced  
243 2.3 times more spores than that of the control (Welch's *t*-test,  $P < 0.001$ , Fig. 4).  
244 However, the increased amount of the MSR medium (40 mL), which presented the  
245 second greatest contribution in the model selection (Table 2), produced fewer  
246 spores than that of the control (20 mL, Fig. 4), which might be because the increased  
247 growth of hairy roots provided more opportunities for AM fungal colonization, but  
248 the medium did not contain sufficient factors for sporulation.

249

### 250 **Success rate of colonization for different species of AM fungi in the optimized** 251 **culture condition**

252 To test whether the modification of P in the MSR medium improved the success rate  
253 of AM fungal colonization by other strains, *C. etunicatum* MAFF520053, *S.*  
254 *cerradensis* MAFF520056, *Am. callosa* MAFF520057, *Ac. longula* MAFF520060, *G.*  
255 *rosea* MAFF520062, *Ac. morrowiae* MAFF520081, *R. clarus* MAFF520086, *P.*  
256 *occultum* MAFF520091, and *C. claroideum* MAFF520092 were cultured under the  
257 modified conditions (3  $\mu\text{M}$  P) and the standard method (30  $\mu\text{M}$  P). The low  
258 concentration of P significantly improved the success rate of AM fungal colonization  
259 for *C. etunicatum* MAFF520053 (from 0% to 20% in EH at 60 DAI; Table 4). The same



260 tendency was observed for *Am. callosa* MAFF520057 (from 0% to 12% in EH at 30  
261 DAI; Table 4) and *R. clarus* MAFF520086 (from 0% to 28% in EH and from 0% to  
262 16% in SF at 30 DAI; from 20% to 44% in EH and from 20% to 40% in SF at 60 DAI;  
263 and from 24% to 44% in EH and from 24% to 40% in SF at 90 DAI; Table 4). In the  
264 case of *G. rosea*, we observed the opposite trend (from 100% to 60% in EH at 30 and  
265 60 DAI; Table 4).

266 To validate the improvement of AM fungal colonization leading to  
267 sporulation in *R. clarus*, the number of spores of *R. clarus* MAFF520086 was  
268 measured only on the spore-forming plates (the number of spore-forming plates in  
269 P30 and P3 were 6 and 10, respectively) and found that 3  $\mu$ M P revealed 3.44 times  
270 more spore formation compared to that of 30  $\mu$ M P (Welch's *t*-test,  $P < 0.001$ , Fig. 5).

271

## 272 **Discussion**

273 Over the past three decades, there have been extensive efforts to improve *in vitro*  
274 monoxenic culture using carrot hairy roots for AM fungi, with only P-free or 30  $\mu$ M  
275 P as the low-P treatment (Bécard & Fortin, 1988b; Declerck et al., 1998; Douds, 2002;  
276 Karandashov et al., 2000; Olsson et al., 2002; Rosikiewicz et al., 2017). Our previous  
277 study showed that an extremely low concentration of P (3  $\mu$ M) in the cocultivation  
278 plate using flax hairy roots increased AM fungal colonization (Sato et al., 2019), but  
279 the success rate of mycorrhizal formation, which is a prerequisite for spore  
280 production, remained to be assessed. This study screened critical factors for the  
281 success rate of mycorrhizal formation and found that the P concentration in the  
282 cocultivation plate is a critical factor for the mycorrhizal formation of several AM  
283 fungi.

284 Glomerales (i.e., *Rhizophagus irregularis* DAOM197198, *Claroideoglossum*  
285 *etunicatum* MAFF520053, and *Rhizophagus clarus* MAFF520086) showed higher  
286 success rates of AM fungal colonization at lower concentrations of P (Table 4). In  
287 addition, Archaeosporales (i.e., *Am. callosa* MAFF520057) developed extraradical  
288 hyphae only at lower concentrations of P (Table 4). In contrast, Diversisporales (i.e.,  
289 *Scutellospora cerradensis* MAFF520056 and *Gigaspora rosea* MAFF520062) may  
290 prefer higher P concentrations in the MSR medium for the success rate of AM fungal  
291 colonization. Although colonization of *Gigaspora margarita*, Diversisporales is  
292 enhanced under low phosphorus conditions (Gutjahr et al., 2009; Navazio et al.,

293 2007; Tawaraya et al., 1998) similar to Glomerales, further studies are required. The  
294 optimal concentration of P may vary depending on the phylogenetic lineage, since P  
295 concentration affects AM fungal colonization and sporulation in a species-specific  
296 manner in pot cultures (Silva et al., 2005; Sylvia & Schenck, 1983).

297 Replacement of the cultivation medium and re-supply of glucose increased  
298 the spore production of *Rhizophagus irregularis* (Douds, 2002). Given that the  
299 increased sucrose concentration in the cocultivation medium at the beginning of  
300 culture did not affect the success rate of mycorrhizal formation in this study (Fig. 2  
301 and Table 2), replenishment of the carbon source after establishment of the plant-  
302 AM fungi symbiotic connection would be critical for mycorrhizal formation.  
303 Although the transition from the elongation of EH to SF is a gradual continuous  
304 change in *R. irregularis*, we observed that the P concentration in the mother plate  
305 affected the success rate of EH, but not that of SF, while P and sucrose in the  
306 cocultivation medium, which were transferred from the mother plate, are important  
307 to the success rate of SF (Table 2). These data suggest that AM fungi should have a  
308 mechanism to sense external nutritional conditions, including host status, to  
309 regulate their stage transition after colonization.

310 AM fungi also control the transfer of nutrients depending on plant carbon  
311 availability (Hammer et al., 2011), and host plants can distinguish the AM fungi that  
312 provide greater P to the host and present them with more carbon sources (Kiers et  
313 al., 2011). This bidirectional control for nutrient transfer in plant-AM fungi is  
314 described by a theoretical framework reflecting experimental data (Jolicoeur et al.,  
315 2002). The development of an effective way to propagate AM fungi must maintain  
316 the optimal balance in material transfer to direct the spore production.

317 The 'minimal (M)' medium was developed and subsequently modified for  
318 *in vitro* monoxenic culture for AM fungi (Bécard & Fortin, 1988; Pawlowska et al.,  
319 1999), but the assessment of different concentrations of P in the medium have been  
320 limited. This study showed that a simple modification in the concentration of P in  
321 the cocultivation plate greatly improved the success rate of mycorrhizal formation  
322 of AM fungi. This modification can be utilized in different types of culture systems  
323 (Rosikiewicz et al., 2017), and can enhance AM fungi propagation. Given that long-  
324 term *in vitro* propagation has the potential to promote the artificial evolution of AM  
325 fungi (Kokkoris & Hart, 2019a, 2019b), the concentration of P would be one of the

326 most important for selective pressure targets for evolution, and an optimal  
327 concentration of P similar to the natural habitat would be required for maintaining  
328 both the function and productivity of AM fungi collections.

329

### 330 **Acknowledgements**

331 We thank Ms. Megumi Sakaguchi and Ms. Tamao Nakatani for their technical  
332 assistance. The present work was supported by the Cabinet Office, Government of  
333 Japan, Cross-ministerial Moonshot Agriculture, Forestry and Fisheries Research and  
334 Development Program, “Technologies for Smart Bio-industry and Agriculture”  
335 (funding agency: Bio-oriented Technology Research Advancement Institution), JST  
336 CREST (JPMJCR1602), and the JST-Mirai Program (JPMJMI20C7) to YI.

337

### 338 **Conflict of interest**

339 The authors declare that they have no competing interests.

340

### 341 **References**

- 342 Aho, K., Derryberry, D., & Peterson, T. (2014). Model selection for ecologists : the  
343 worldviews of AIC and BIC. *Ecology*, *95*(3), 631–636.  
344 <http://www.esajournals.org/doi/full/10.1890/13-1452.1>
- 345 Al-Karaki, G., McMichael, B., & Zak, J. (2004). Field response of wheat to arbuscular  
346 mycorrhizal fungi and drought stress. *Mycorrhiza*, *14*(4), 263–269.  
347 <https://doi.org/10.1007/s00572-003-0265-2>
- 348 Augé, R. M., Toler, H. D., & Saxton, A. M. (2014). Arbuscular mycorrhizal symbiosis  
349 alters stomatal conductance of host plants more under drought than under  
350 amply watered conditions: a meta-analysis. *Mycorrhiza*, *25*(1), 13–24.  
351 <https://doi.org/10.1007/s00572-014-0585-4>
- 352 Bécard, G., & Fortin, J. A. (1988). Early events of vesicular-arbuscular mycorrhiza  
353 formation on Ri T-DNA transformed roots. *New Phytologist*, *108*, 211–218.  
354 <https://doi.org/10.1111/j.1469-8137.1988.tb03698.x>
- 355 Berruti, A., Lumini, E., Balestrini, R., & Bianciotto, V. (2016). Arbuscular  
356 mycorrhizal fungi as natural biofertilizers: Let’s benefit from past successes.  
357 *Frontiers in Microbiology*, *6*(JAN), 1–13.  
358 <https://doi.org/10.3389/fmicb.2015.01559>

- 359 Boldt, K., Pörs, Y., Haupt, B., Bitterlich, M., Kühn, C., Grimm, B., & Franken, P. (2011).  
360 Photochemical processes, carbon assimilation and RNA accumulation of  
361 sucrose transporter genes in tomato arbuscular mycorrhiza. *Journal of Plant*  
362 *Physiology*, 168(11), 1256–1263. <https://doi.org/10.1016/j.jplph.2011.01.026>
- 363 Brundrett, M. C. (2009). Mycorrhizal associations and other means of nutrition of  
364 vascular plants: Understanding the global diversity of host plants by resolving  
365 conflicting information and developing reliable means of diagnosis. *Plant and*  
366 *Soil*, 320(1–2), 37–77. <https://doi.org/10.1007/s11104-008-9877-9>
- 367 Ceballos, I., Ruiz, M., Fernández, C., Peña, R., Rodríguez, A., & Sanders, I. R. (2013).  
368 The in vitro mass-produced model mycorrhizal fungus, *Rhizophagus*  
369 *irregularis*, significantly increases yields of the globally important food  
370 security crop cassava. *PLoS One*, 8(8), e70633.  
371 <https://doi.org/10.1371/journal.pone.0070633>
- 372 Chabot, S., Bécard, G., & Piché, Y. (1992). Life cycle of *Glomus intraradix* in root  
373 organ culture. *Mycologia*, 84, 315–321.  
374 <https://doi.org/doi.org/10.2307/3760183>
- 375 Cranenbrouck, S., Voets, L., & Bivort, C. (2005). Methodologies for in Vitro  
376 Cultivation of Arbuscular Mycorrhizal Fungi with Root Organs. In S Declerck,  
377 D. Strullu, & J. Fortin (Eds.), *In Vitro Culture of Mycorrhizas* (pp. 341–375).  
378 Springer.
- 379 Declerck, Stéphane, Strullu, D. G., & Plenchette, C. (1998). Monoxenic culture of the  
380 intraradical forms of *Glomus* sp. isolated from a tropical ecosystem: A  
381 proposed methodology for germplasm collection. *Mycologia*, 90(4), 579–585.  
382 <https://doi.org/10.2307/3761216>
- 383 Díaz, G., Azcón-Aguilar, C., & Honrubia, M. (1996). Influence of arbuscular  
384 mycorrhizae on heavy metal (Zn and Pb) uptake and growth of *Lygeum*  
385 *spartum* and *Anthyllis cytisoides*. *Plant and Soil*, 180(2), 241–249.  
386 <https://doi.org/10.1007/bf00015307>
- 387 Douds, D. D. (2002). Increased spore production by *Glomus intraradices* in the  
388 split-plate monoxenic culture system by repeated harvest, gel replacement,  
389 and resupply of glucose to the mycorrhiza. *Mycorrhiza*, 12(4), 163–167.  
390 <https://doi.org/10.1007/s00572-002-0174-9>
- 391 Fortin, J. A., Bécard, G., Declerck, S., Dalpé, Y., St-Arnaud, M., Coughlan, A. P., &

- 392 Piché, Y. (2002). Arbuscular mycorrhiza on root-organ cultures. *Canadian*  
393 *Journal of Botany*, 80(1), 1–20. <https://doi.org/10.1139/b01-139>
- 394 Gerdemann, J. W. (1955). Relation of a large soil-borne spore to phycomycetous  
395 mycorrhizal infections. *Mycologia*, 47(5), 619–632.
- 396 Gutjahr, C., Novero, M., Guether, M., Montanari, O., Udvardi, M., & Bonfante, P.  
397 (2009). Presymbiotic factors released by the arbuscular mycorrhizal fungus  
398 *Gigaspora margarita* induce starch accumulation in *Lotus japonicus* roots:  
399 Rapid report. *New Phytologist*, 183(1), 53–61.  
400 <https://doi.org/10.1111/j.1469-8137.2009.02871.x>
- 401 Hammer, E. C., Pallon, J., Wallander, H., & Olsson, P. A. (2011). Tit for tat? A  
402 mycorrhizal fungus accumulates phosphorus under low plant carbon  
403 availability. *FEMS Microbiology Ecology*, 76(2), 236–244.  
404 <https://doi.org/10.1111/j.1574-6941.2011.01043.x>
- 405 Hijri, M. (2016). Analysis of a large dataset of mycorrhiza inoculation field trials on  
406 potato shows highly significant increases in yield. *Mycorrhiza*, 26(3), 209–214.  
407 <https://doi.org/10.1007/s00572-015-0661-4>
- 408 Jolicoeur, M., Bouchard-Marchand, E., Bécard, G., & Perrier, M. (2002). Regulation  
409 of mycorrhizal symbiosis: Development of a structured nutritional dual  
410 model. *Ecological Modelling*, 158(1–2), 121–142.  
411 [https://doi.org/10.1016/S0304-3800\(02\)00168-0](https://doi.org/10.1016/S0304-3800(02)00168-0)
- 412 Jung, S. C., Martinez-Medina, A., Lopez-Raez, J. A., & Pozo, M. J. (2012). Mycorrhiza-  
413 induced resistance and priming of plant defenses. *Journal of Chemical Ecology*,  
414 38(6), 651–664. <https://doi.org/10.1007/s10886-012-0134-6>
- 415 Karandashov, V., Kuzovkina, I., Hawkins, H. J., & George, E. (2000). Growth and  
416 sporulation of the arbuscular mycorrhizal fungus *Glomus caledonium* in dual  
417 culture with transformed carrot roots. *Mycorrhiza*, 10(1), 23–28.  
418 <https://doi.org/10.1007/s005720050283>
- 419 Kiers E.T., Duhamel M., Beesetty Y., Mensah J.A., Franken O., Verbruggen E.,  
420 Fellbaum C.R., Kowalchuk G.A., Hart M.M., Bago A., Palmer T.M., West S.A.,  
421 Vandenkoornhuysen P., Jansa J., Bucking H. (2011) Reciprocal rewards stabilize  
422 cooperation in the mycorrhizal symbiosis. *Science*, 333(6044), 880–882  
423 <https://doi.org/10.1126/science.1208473>.
- 424 Kokkoris, V., & Hart, M. (2019a). In vitro propagation of arbuscular mycorrhizal

- 425 fungi may drive fungal evolution. *Frontiers in Microbiology*, 10(OCT).  
426 <https://doi.org/10.3389/fmicb.2019.02420>
- 427 Kokkoris, V., & Hart, M. M. (2019b). The role of in vitro cultivation on symbiotic  
428 trait and function variation in a single species of arbuscular mycorrhizal  
429 fungus. *Fungal Biology*, 123(10), 732–744.  
430 <https://doi.org/doi.org/10.1016/j.funbio.2019.06.009>
- 431 Luginbuehl, L. H., Menard, G. N., Kurup, S., Van Erp, H., Radhakrishnan, G. V.,  
432 Breakspear, A., Oldroyd, G. E. D., & Eastmond, P. J. (2017). Fatty acids in  
433 arbuscular mycorrhizal fungi are synthesized by the host plant. *Science*,  
434 356(6343), 1175–1178. <https://doi.org/10.1126/science.aan0081>
- 435 McLeod, A. I., Xu, C., & Lai, Y. (2020). *bestglm: Best Subset GLM and Regression*  
436 *Utilities. R package version 0.37.3*. <https://cran.r-project.org/package=bestglm>
- 437 Mugnier, J., & Mosse, B. (1987). Vesicular–arbuscular infections in Ri T-DNA  
438 transformed roots grown axenically. *Phytopathology*, 77, 1045–1050.
- 439 Navazio, L., Moscatiello, R., Genre, A., Novero, M., Baldan, B., Bonfante, P., & Mariani,  
440 P. (2007). A diffusible signal from arbuscular mycorrhizal fungi elicits a  
441 transient cytosolic calcium elevation in host plant cells. *Plant Physiology*,  
442 144(2), 673–681. <https://doi.org/10.1104/pp.106.086959>
- 443 Olsson, P. A., van Aarle, I. M., Allaway, W. G., Ashford, A. E., & Rouhier, H. (2002).  
444 Phosphorus effects on metabolic processes in monoxenic arbuscular  
445 mycorrhiza cultures. *Plant Physiology*, 130(3), 1162–1171.  
446 <https://doi.org/10.1104/pp.009639.the>
- 447 Pawlowska, T. E., Douds, D. D., & Charvat, I. (1999). In vitro propagation and life  
448 cycle of the arbuscular mycorrhizal fungus *Glomus etunicatum*. *Mycological*  
449 *Research*, 103(12), 1549–1556.  
450 <https://doi.org/10.1017/S0953756299008801>
- 451 Porcel, R., Aroca, R., & Ruiz-Lozano, J. M. (2012). Salinity stress alleviation using  
452 arbuscular mycorrhizal fungi. A review. *Agronomy for Sustainable*  
453 *Development*, 32(1), 181–200. <https://doi.org/10.1007/s13593-011-0029-x>
- 454 Pozo, M. J., & Azcón-Aguilar, C. (2007). Unraveling mycorrhiza-induced resistance.  
455 *Current Opinion in Plant Biology*, 10(4), 393–398.  
456 <https://doi.org/10.1016/j.pbi.2007.05.004>
- 457 Redecker, D., Morton, J. B., & Bruns, T. D. (2000). Ancestral lineages of arbuscular

- 458 mycorrhizal fungi (Glomales). *Molecular Phylogenetics and Evolution*, *14*(2),  
459 276–284. <https://doi.org/10.1006/mpev.1999.0713>
- 460 Redecker, D., Schüßler, A., Stockinger, H., Stürmer, S.L., Morton, J.B., Walker, C.,  
461 (2013). An evidence-based consensus for the classification of arbuscular  
462 mycorrhizal fungi (Glomeromyota). *Mycorrhiza*, *23*, 515–531.  
463 <https://doi.org/10.1007/s00572-013-0486-y>
- 464 Rosikiewicz, P., Bonvin, J., & Sanders, I. R. (2017). Cost-efficient production of in  
465 vitro *Rhizophagus irregularis*. *Mycorrhiza*, *27*(5), 477–486.  
466 <https://doi.org/10.1007/s00572-017-0763-2>
- 467 Sato, T., Hachiya, S., Inamura, N., Ezawa, T., Cheng, W., & Tawaraya, K. (2019).  
468 Secretion of acid phosphatase from extraradical hyphae of the arbuscular  
469 mycorrhizal fungus *Rhizophagus clarus* is regulated in response to phosphate  
470 availability. *Mycorrhiza*, *29*(6), 599–605. [https://doi.org/10.1007/s00572-](https://doi.org/10.1007/s00572-019-00923-0)  
471 [019-00923-0](https://doi.org/10.1007/s00572-019-00923-0)
- 472 Sawers, R. J. H., Gutjahr, C., & Paszkowski, U. (2008). Cereal mycorrhiza: an ancient  
473 symbiosis in modern agriculture. *Trends in Plant Science*, *13*(2), 93–97.  
474 <https://doi.org/10.1016/j.tplants.2007.11.006>
- 475 Silva, F. S. B., Yano-Melo, A. M., Brandão, J. A. C., & Maia, L. C. (2005). Sporulation of  
476 arbuscular mycorrhizal fungi using Tris-HCl buffer in addition to nutrient  
477 solutions. *Brazilian Journal of Microbiology*, *36*(4), 327–332.  
478 <https://doi.org/10.1007/s11126-005-4966-x>
- 479 Smith S. E., & Read D. (2008) *Mycorrhizal symbiosis*, 3rd edn. Academic, London
- 480 Spatafora, J. W., Chang, Y., Benny, G. L., Lazarus, K., Smith, M. E., Berbee, M. L.,  
481 Bonito, G., Corradi, N., Grigoriev, I., Gryganskyi, A., James, T. Y., O'Donnell, K.,  
482 Roberson, R. W., Taylor, T. N., Uehling, J., Vilgalys, R., White, M. M., & Stajich, J.  
483 E. (2016). A phylum-level phylogenetic classification of zygomycete fungi  
484 based on genome-scale data. *Mycologia*, *108*(5), 1028–1046.  
485 <https://doi.org/10.3852/16-042>
- 486 Sylvia, D. M., & Schenck, N. C. (1983). Application of superphosphate to  
487 mycorrhizal plants stimulates sporulation of phosphorus-tolerant vesicular-  
488 arbuscular mycorrhizal fungi. *The New Phytologist*, *95*, 655–661.
- 489 Tawaraya, K., Hashimoto, K., & Wagatsuma, T. (1998). Effect of root exudate  
490 fractions from P-deficient and P-sufficient onion plants on root colonisation

491 by the arbuscular mycorrhizal fungus *Gigaspora margarita*. *Mycorrhiza*, 8(2),  
492 67–70. <https://doi.org/10.1007/s005720050214>  
493



494 **Table 1** | List of all culture conditions evaluated in this study. Bold indicates culture  
 495 conditions of GINCOs standard protocol.

| Experimenter | Mother P      | Essential elements | P concentration | Sucrose concentration | Amount of MSR medium   | Location of spore inoculation | Reprication |
|--------------|---------------|--------------------|-----------------|-----------------------|------------------------|-------------------------------|-------------|
|              | $\mu\text{M}$ | fold               | $\mu\text{M}$   | $\text{g L}^{-1}$     | $\text{mL plate}^{-1}$ | cm                            |             |
| A            | <b>30</b>     | <b>1</b>           | <b>30</b>       | <b>10</b>             | <b>20</b>              | <b>1</b>                      | <b>10</b>   |
| A            | 30            | 1                  | 30              | 10                    | 20                     | 1.5                           | 10          |
| A            | 30            | 1                  | 30              | 10                    | 20                     | 2                             | 10          |
| A            | 30            | 1                  | 30              | 10                    | 20                     | 2.5                           | 10          |
| A            | 30            | 1                  | 30              | 10                    | 20                     | 3                             | 10          |
| A            | 30            | 1                  | 30              | 10                    | 10                     | 2.5                           | 5           |
| A            | 30            | 1                  | 30              | 10                    | 40                     | 2.5                           | 5           |
| A            | 30            | 1                  | 30              | 10                    | 20                     | 2.5                           | 5           |
| A            | 30            | 0.5                | 15              | 10                    | 20                     | 2.5                           | 5           |
| A            | 30            | 0.5                | 3               | 10                    | 20                     | 2.5                           | 5           |
| A            | 3             | 1                  | 30              | 10                    | 20                     | 2.5                           | 5           |
| A            | 3             | 0.5                | 15              | 10                    | 20                     | 2.5                           | 5           |
| A            | 3             | 0.5                | 3               | 10                    | 20                     | 2.5                           | 5           |
| A            | 3             | 1                  | 30              | 10                    | 40                     | 2.5                           | 2           |
| A            | 3             | 0.5                | 15              | 10                    | 40                     | 2.5                           | 2           |
| A            | 3             | 0.5                | 3               | 10                    | 40                     | 2.5                           | 2           |
| B            | <b>30</b>     | <b>1</b>           | <b>30</b>       | <b>10</b>             | <b>20</b>              | <b>1</b>                      | <b>5</b>    |
| B            | 30            | 1                  | 30              | 10                    | 20                     | 2.5                           | 15          |
| B            | 3             | 1                  | 30              | 10                    | 20                     | 2.5                           | 5           |
| B            | 30            | 1                  | 3               | 10                    | 20                     | 2.5                           | 5           |
| B            | 3             | 1                  | 3               | 10                    | 20                     | 2.5                           | 5           |
| B            | 30            | 1                  | 0.3             | 10                    | 20                     | 2.5                           | 5           |
| B            | 3             | 0.5                | 3               | 10                    | 20                     | 2.5                           | 5           |
| B            | 30            | 0.5                | 3               | 10                    | 20                     | 2.5                           | 5           |
| B            | 30            | 1                  | 30              | 20                    | 20                     | 2.5                           | 5           |
| B            | 30            | 0.5                | 3               | 20                    | 20                     | 2.5                           | 5           |

496

497 **Table 2** | BIC of the best model and the contribution of selected factors. The  
498 contribution of an explanatory variable is shown as the amount of decrease in BIC  
499 when that variable is excluded. A blank space means that the factor was not selected  
500 as the explanatory variable.

501

| Days after inoculation |    | BIC   | $\Delta$ BIC |                      |          |          | Amount of medium | Inoculated position |
|------------------------|----|-------|--------------|----------------------|----------|----------|------------------|---------------------|
|                        |    |       | Mother P     | Macronutrient medium | Medium P | Medium C |                  |                     |
| 30                     | EH | 819.9 | 10.7         |                      | 60.5     | 10       |                  |                     |
|                        | SF | 538.6 |              |                      | 121.9    | 8.9      |                  |                     |
| 60                     | EH | 995.8 |              |                      | 41.7     | 21.6     | 6.6              |                     |
|                        | SF | 824.2 |              |                      | 56.4     | 24.7     | 7.8              |                     |

502

503 **Table 3** | Relationship between mathematical transformation of P concentration and  
504 BIC, calculated by elongation of extraradical hyphae (EH) and spore formation (SF)  
505 of each plate, for 0.3, 3, 15, and 30  $\mu\text{M}$  P treatments at 30 and 60 days after  
506 inoculation (DAI). The numbers represent BIC. In the first column, x represents no  
507 processing,  $x^2$  represents squaring,  $\log(x)$  represents logarithmic transformation,  
508 and  $\log(x)^2$  represents squaring after logarithmic transformation.  
509

|             | 30 DAI |       | 60 DAI |       |
|-------------|--------|-------|--------|-------|
|             | EH     | SF    | EH     | SF    |
| x           | 836.4  | 547.5 | 1021.5 | 853.2 |
| $x^2$       | 837.0  | 553.9 | 1023.3 | 859.5 |
| $\log(x)$   | 856.1  | 576.7 | 1029.0 | 860.5 |
| $\log(x)^2$ | 835.8  | 541.7 | 1019.4 | 847.1 |

510

511 **Table 4** Success rate of arbuscular mycorrhizal (AM) fungal colonization of 9 AMF,  
 512 calculated by elongation of extraradical hyphae (EH) and spore formation (SF) of  
 513 each plate, for 30 and 3  $\mu$ M P treatments at 30, 60, and 90 days after inoculation  
 514 (DAI).  
 515

| AMF                                | Strain name | MAFF No. | P level | 30 DAI |        | 60 DAI |        | 90 DAI |        |
|------------------------------------|-------------|----------|---------|--------|--------|--------|--------|--------|--------|
|                                    |             |          |         | EH (%) | SF (%) | EH (%) | SF (%) | EH (%) | SF (%) |
| <i>Claroideoglossum etunicatum</i> | H1-1        | 520053   | 30      | 0      | 0      | 0      | 0      | 0      | 0      |
|                                    |             |          | 3       | 0      | 0      | 20     | 0      | 24     | 0      |
| <i>Scutellospora cerradensis</i>   | TK-1        | 520056   | 30      | 40     | 0      | 40     | 0      | 40     | 0      |
|                                    |             |          | 3       | 40     | 0      | 40     | 0      | 40     | 0      |
| <i>Ambispora callosa</i>           | OK-1        | 520057   | 30      | 0      | 0      | 0      | 0      | 0      | 0      |
|                                    |             |          | 3       | 0      | 0      | 0      | 0      | 12     | 0      |
| <i>Acaulospora longula</i>         | F-1         | 520060   | 30      | 0      | 0      | 0      | 0      | 0      | 0      |
|                                    |             |          | 3       | 0      | 0      | 0      | 0      | 0      | 0      |
| <i>Gigaspora rosea</i>             | C1          | 520062   | 30      | 100    | 0      | 100    | 0      | 100    | 0      |
|                                    |             |          | 3       | 60     | 0      | 60     | 0      | 60     | 0      |
| <i>Acaulospora morrowiae</i>       | AP-5        | 520081   | 30      | 0      | 0      | 0      | 0      | 0      | 0      |
|                                    |             |          | 3       | 0      | 0      | 0      | 0      | 0      | 0      |
| <i>Rhizophagus clarus</i>          | RF1         | 520086   | 30      | 0      | 0      | 8      | 4      | 24     | 24     |
|                                    |             |          | 3       | 28     | 16     | 40     | 28     | 44     | 40     |
| <i>Paraglossum occultum</i>        | YC-1        | 520091   | 30      | 0      | 0      | 4      | 4      | 4      | 4      |
|                                    |             |          | 3       | 0      | 0      | 4      | 0      | 4      | 4      |
| <i>Claroideoglossum claroideum</i> | MI-1        | 520092   | 30      | 0      | 0      | 0      | 0      | 0      | 0      |
|                                    |             |          | 3       | 0      | 0      | 0      | 0      | 0      | 0      |

516

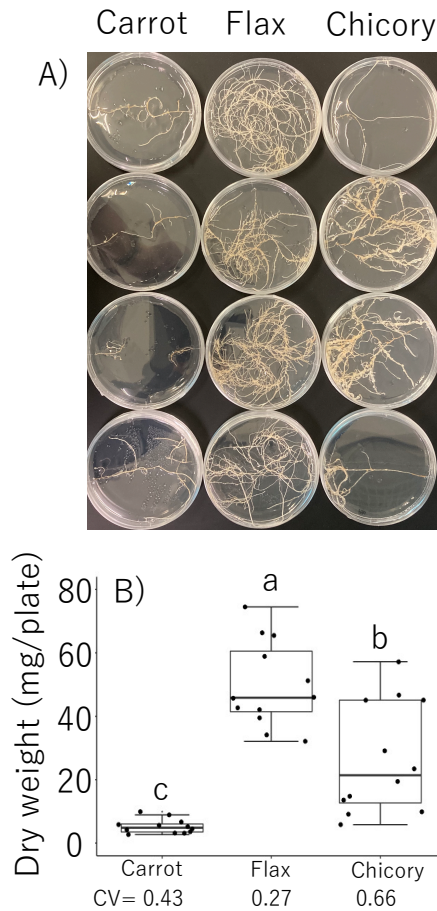

517

518 **Figure 1** | Evaluation of growth of hairy roots derived from different plant species.  
519 Gross morphology (A) and dry weight (B) from hairy root of carrot (*Daucus carota*  
520 strain carrotDC2), flax (*Linum* sp. strain flax NM), and chicory (*Cichorium intybus*  
521 strain ChicoryA4NH) at 4 weeks after incubation are shown. Error bars and CV  
522 indicate the standard error and coefficient of variance, respectively (n=12). Different  
523 letters indicate significant differences as determined by Tukey's honestly significant  
524 difference test ( $P < 0.05$ ).

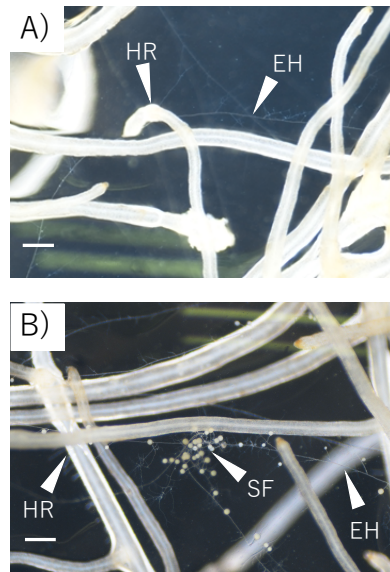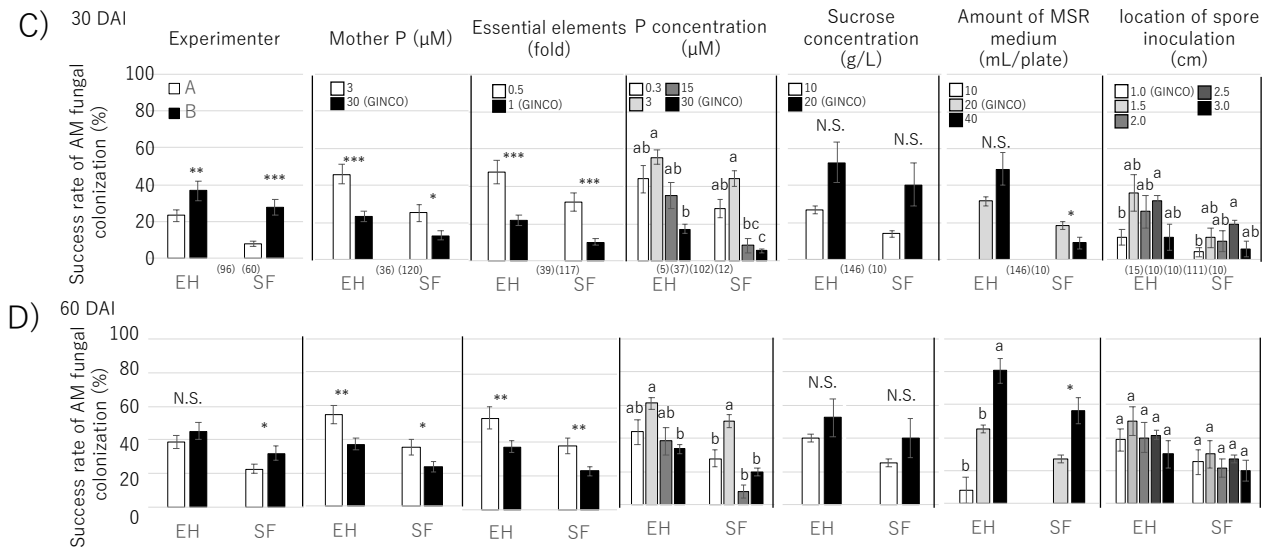

525  
 526 **Figure 2 |** Evaluation of the success rate of AM fungal colonization in different culture conditions.  
 527 Elongation of extraradical hyphae (EH) from hairy roots (HR) of Flax (*Linum* sp. MUCLflax NM, A), and spore formation (SF, B).  
 528 White bars indicate 500 μm. Success rate of arbuscular mycorrhizal (AM) fungal colonization, calculated by elongation of  
 529 extraradical hyphae (EH) and spore formation (SF) of each plate, for each treatment at 30 (C) and 60 (D) days after inoculation  
 530 (DAI). Error bars indicate standard errors. Different letters indicate significant differences as determined by the Games-Howell  
 531 test ( $P < 0.05$ ). Asterisks indicate significant differences by Welch's *t*-test (\*\*\*,  $P < 0.001$ ; \*\*,  $P < 0.01$ ; \*,  $P < 0.05$ ).  
 532

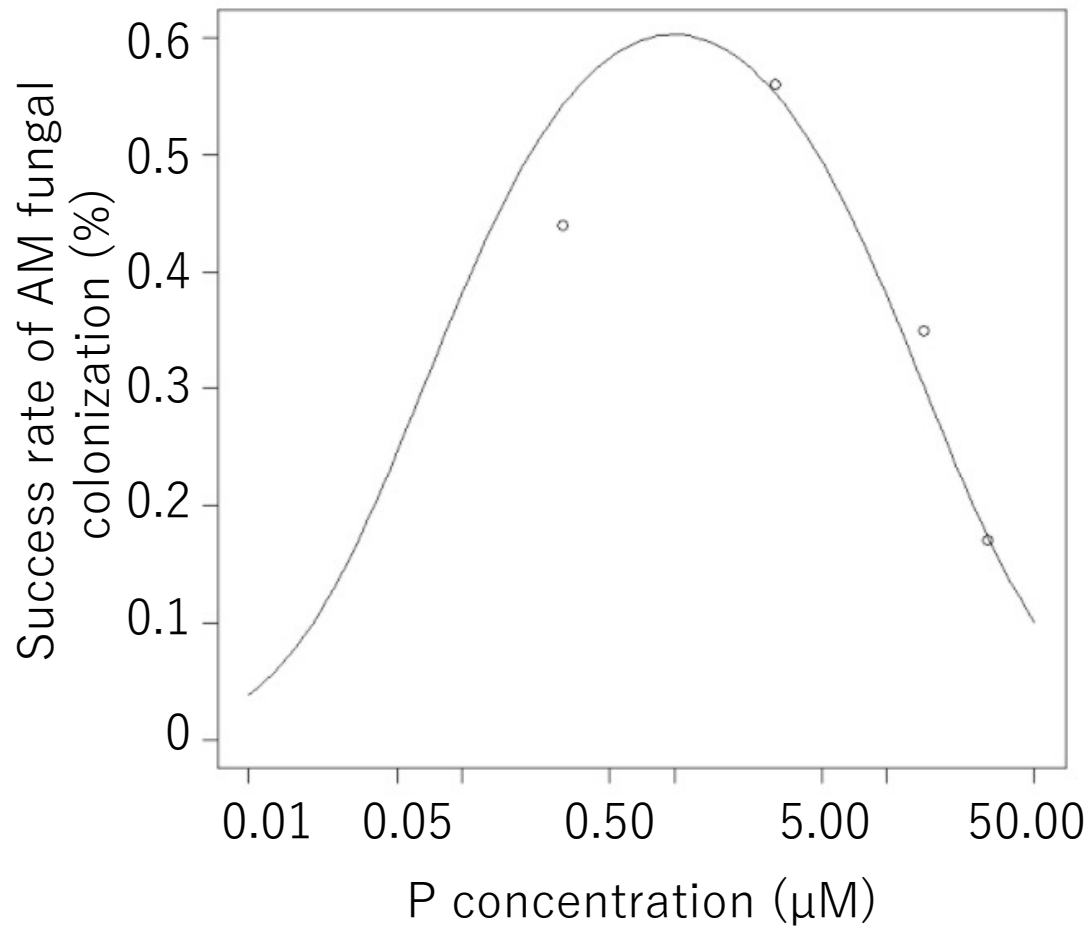

533

534 **Figure 3** |  $-\log(x)^2$  model calculated from success rate of arbuscular mycorrhizal  
535 (AM) fungal colonization of *Rhizophagus irregularis* DAOM197198, calculated by  
536 elongation of extraradical hyphae (EH) for 0.3, 3, 15, and 30  $\mu\text{M}$  P at 30 days after  
537 inoculation in Experiment 2.

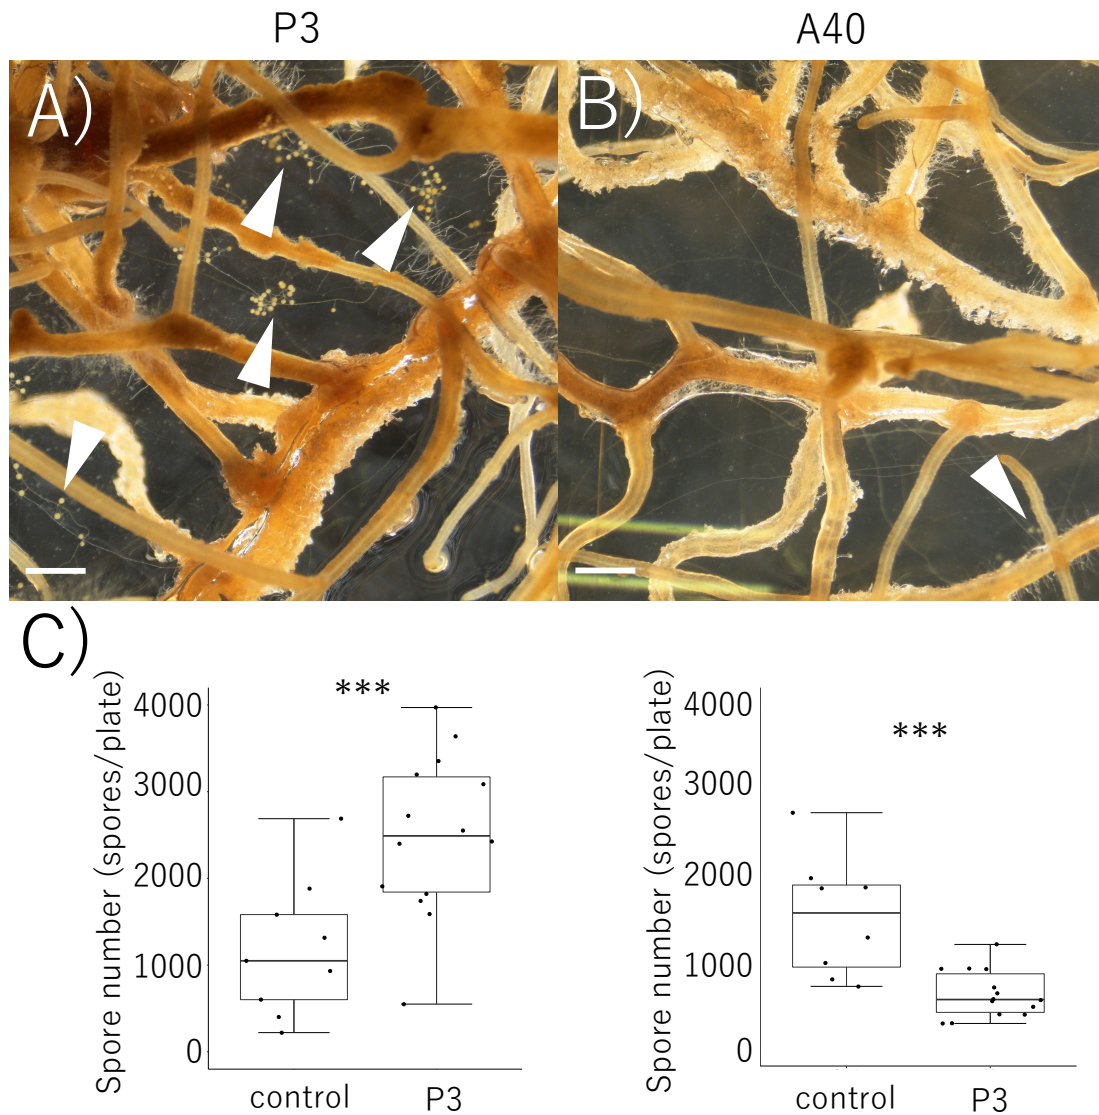

538

539 **Figure 4** | Evaluation of the spore formation in different culture conditions.

540 Spore formation *Rhizophagus irregularis* DAOM197198 P3 (A) and 40 mL (B)

541 treatments in Experiment 2, and number of spores of both treatments (C) at 11

542 months. Error bars indicate standard errors. White bars indicate 500  $\mu$ m, and white

543 arrows indicate spores formed in the modified Strullu-Romand medium. Asterisks

544 indicate significant differences by Welch's *t*-test (\*\*\*,  $P < 0.001$ ).



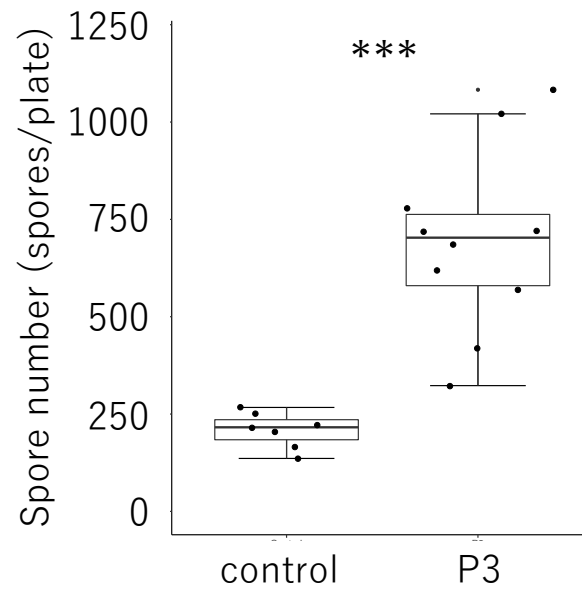

545

546 **Figure 5** | Evaluation of the spore formation in the optimized culture conditions.

547 Number of spores of *Rhizophagus clarus* MAFF 520086 in control (30  $\mu$ M P) and P3

548 treatments in Experiment 3 at 90 days after inoculation. Error bars indicate

549 standard errors. Asterisks indicate significant differences by Welch's *t*-test ( $p < 0.001$

550 =\*\*\*).
